# Supplementary material for: Improving the bioactivity of Zn(ii)-curcumin based complexes
Source: Royal Society of Chemistry journal article supplement (doi:10.1039/c3dt50513h), 2013-01-01

## Electronic Supplementary Information for

### Improving the bioactivity of Zn(II)-curcumin based complexes

Daniela Pucci,<sup>\*a</sup> Alessandra Crispini,<sup>a</sup> Bárbara Sanz Mendiguchía,<sup>a</sup> Sante Pirillo,<sup>a</sup> Mauro Ghedini,<sup>a</sup> Sabrina Morelli,<sup>b</sup> Loredana De Bartolo<sup>b</sup>

**Fig. S1** UV/vis absorption spectra of complexes **1** (a) and **2** (b), in ethanol fresh solution and after 24, 48h, 72 h.

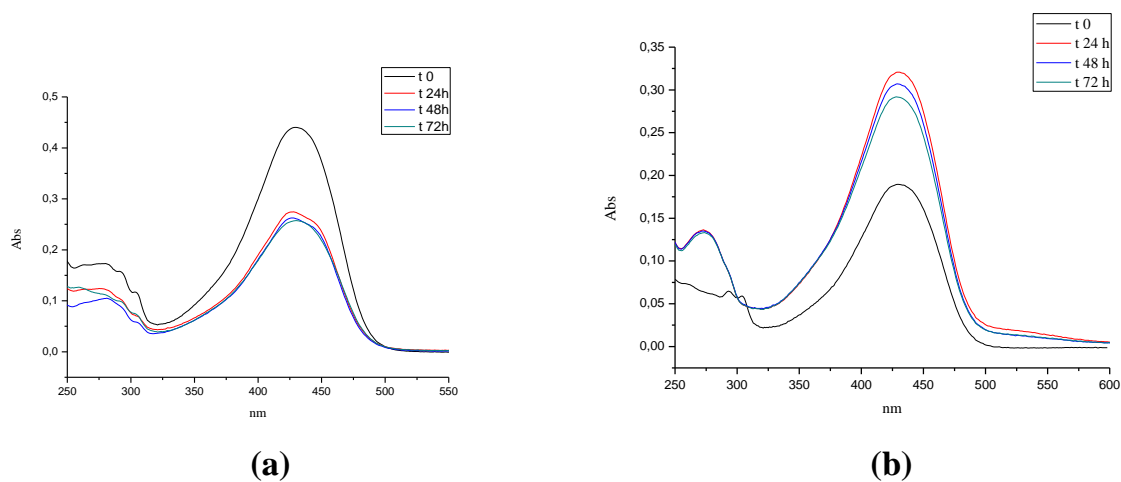

**Fig. S2** UV/vis emission spectra of complexes **1** (a) and **2** (b) in ethanol solution

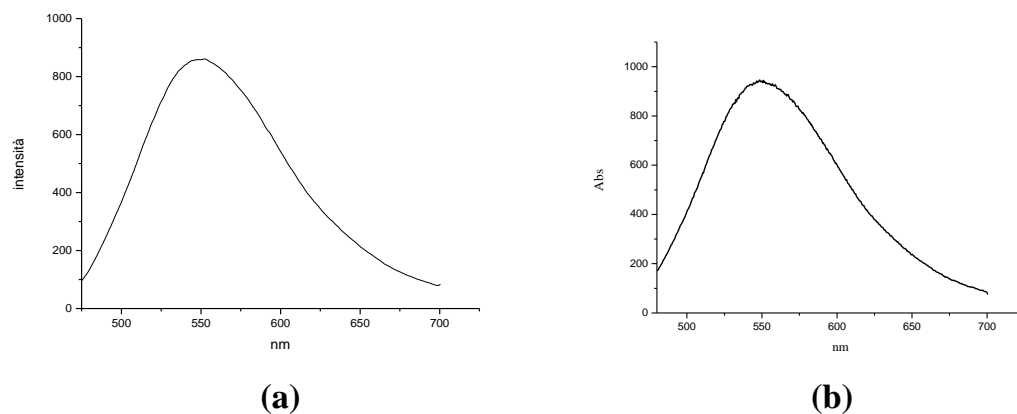

**Fig. S3** Confocal image of complex **1** fluorescence in SHSY5Y cells after 24 hour of culture.

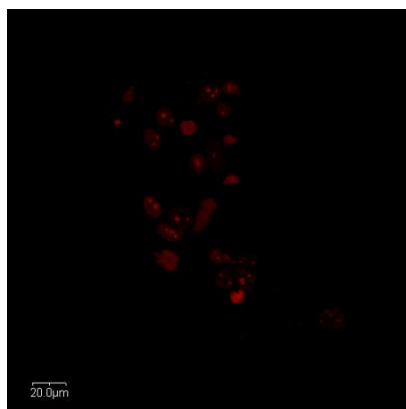

Supplement: c3dt50513h.pdf [file c3dt50513h.pdf]
